# Supplementary material
Source: publisher figshare collection journal article supplement (https://karger.figshare.com/ndownloader/files/22655501)
Supplement: Supplementary file 1 [file 22655501]

**Abbreviation List**

BMI: body mass index

CMS: cervical magnetic stimulation of the phrenic nerves

COPD: chronic obstructive pulmonary disease

dCMAP: diaphragm compound muscle action potentials

DTR: diaphragm thickening ratio

ELISAs: enzyme-linked immunosorbent assays

FEV1 forced expiratory volume in one second

FRC functional residual capacity

FVC forced vital capacity

IL-6 interleukin-6

LTRs lung transplant recipients

PEmax maximum expiratory pressure

PImax maximum inspiratory pressure

6MWD 6-minute walking distance

PCF peak cough flow

TLC total lung capacity

TNF-α tumor necrosis factor-α

TwPdi twitch transdiaphragmatic pressure

TwPes twitch esophageal pressure

TwPgas twitch gastric pressure
